# Supplementary material
Source: HighWire-hosted journal article supplement (https://bmjopen.bmj.com/highwire/filestream/202980/field_highwire_adjunct_files/0/ARD_table_155416.pdf)
Supplement: ARD_table_155416.pdf [file ARD_table_155416.pdf]

### Supplementary table 8. Chronic stress exposure as a linear trend over all surveys preceding conception.

As part of a sensitivity analysis, this exposure was also defined only for women with multiple ( $\geq 2$ ) recorded stress scores prior to conception, including at least one measure within three years preconception. Using survey return dates, the mean, linear score change per year between Survey 1 and the most recent pre-conception survey was estimated via linear regression. That is, stress score was regressed against survey return date separately for each woman and the average slope over time was derived. This slope was used as the risk factor variable, adjusting for baseline stress (mean score at Survey 1).

#### Linear regression results for continuous birth weight (grams)

| <i>Variable</i>                              | <i>Category</i>             | <i>Beta coefficient</i> | <i>95% Lower</i> | <i>95% Upper</i> | <i>P-value</i> |
|----------------------------------------------|-----------------------------|-------------------------|------------------|------------------|----------------|
| Intercept                                    |                             | 3474.30                 | 3379.97          | 3568.63          | <.0001         |
| Stress trend (per 0.1-unit annual increase)  |                             | 0.23                    | -32.41           | 32.87            | 0.9890         |
| Offspring sex (ref=Male)                     | Female                      | -163.56                 | -215.18          | -111.93          | <.0001         |
| Maternal age (years)                         |                             | -5.76                   | -15.24           | 3.72             | 0.2335         |
| Marital status (ref=Partnered)               | Not partnered               | 41.93                   | -18.08           | 101.94           | 0.1708         |
| Education (ref=Year12 or less)               | Non-university tertiary     | -67.40                  | -143.65          | 8.86             | 0.0832         |
| Education (ref=Year12 or less)               | University or higher degree | -9.78                   | -78.56           | 59.00            | 0.7805         |
| Residential area (ref=Outer regional/remote) | Inner regional              | 52.79                   | -31.11           | 136.69           | 0.2175         |
| Residential area (ref=Outer regional/remote) | Major city                  | 33.00                   | -38.32           | 104.32           | 0.3645         |

There was no relationship between the longitudinal linear trend of reported stress and birth weight (coefficient = 0.23, p=0.99).
